# Supplementary material for: Effects of Lactobacillus plantarum PS128 on Children with Autism Spectrum Disorder in Taiwan: A Randomized, Double-Blind, Placebo-Controlled Trial
Source: MDPI journal article supplement (doi:10.3390/nu11040820), 2019-04-11
Supplement: s1 [file s1]

## Supplementary Materials

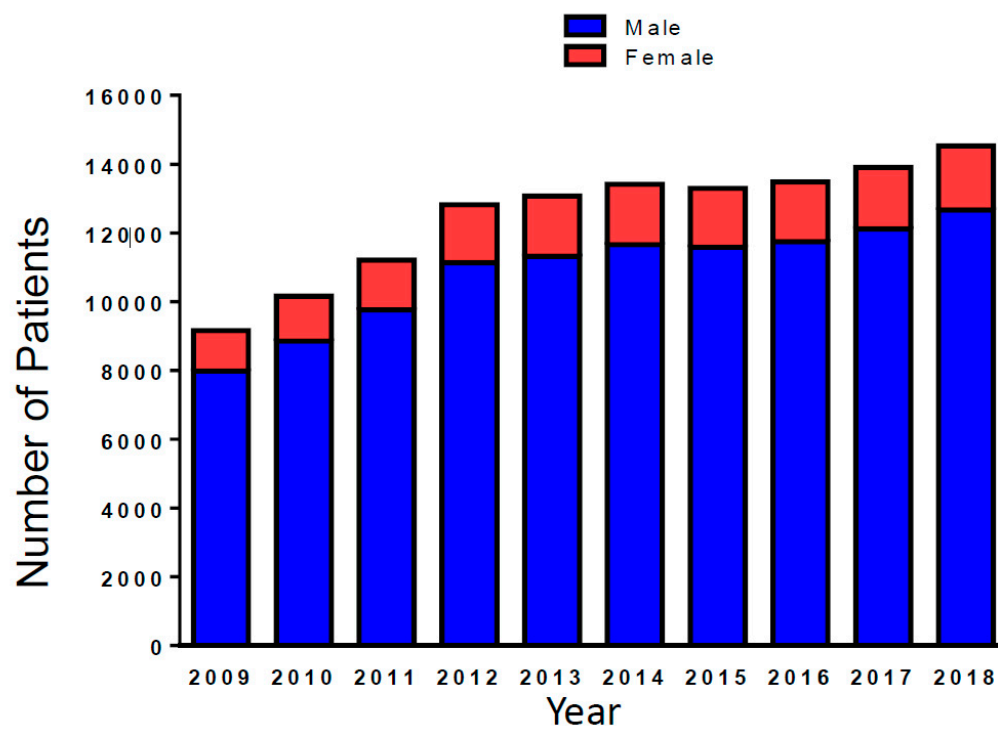

**Figure S1.** Numbers of patients diagnosed with autism spectrum disorder in Taiwan in the recent 10 years.
